# Supplementary material
Source: PubMed Central journal article supplement (PMC4169771)
Supplement: NIHMS618796-supplement-01.pdf [file NIHMS618796-supplement-01.pdf]

## SUPPLEMENTAL FIGURES AND LEGENDS

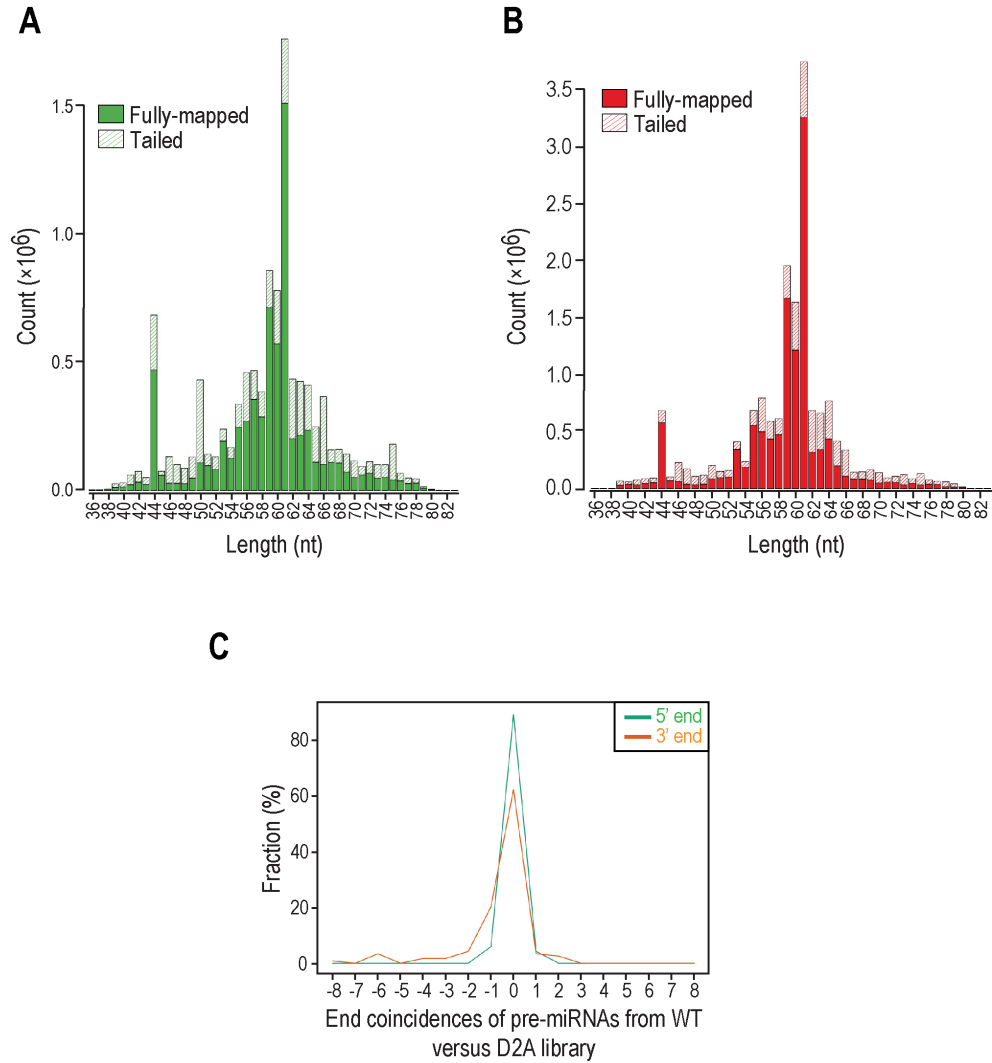

**Figure S1. Related to Figure 1**

*Genome-wide profiling of Ago-bound, full-length precursor miRNAs*

**A, B.** Length distribution of fully-mapped or tailed reads in *WT* (**A**) or *D2A* (**B**) pre-miRNA libraries.

**C.** Coincidence of defined 5' or 3' ends of pre-miRNAs between *WT* and *D2A* pre-miRNA libraries. Positive and negative values indicate that the defined ends of pre-miRNAs from the *WT* library are beyond and within those from the *D2A* library respectively.

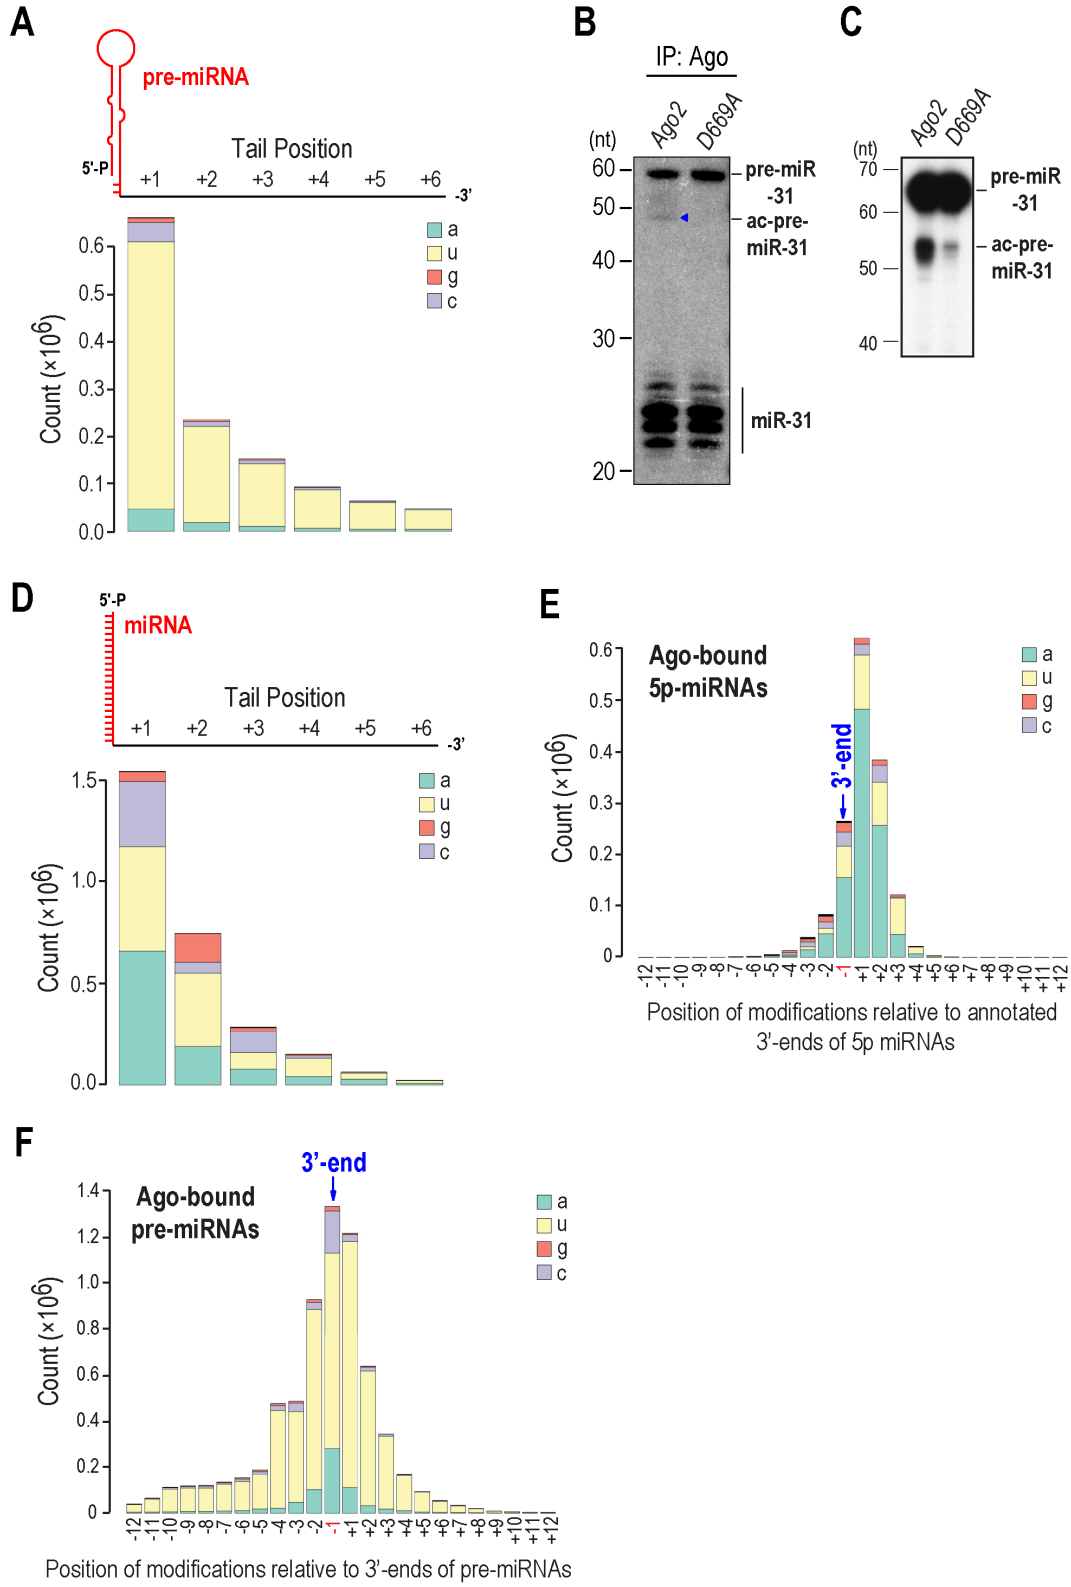

**Figure S2.**

**Figure S2. Related to Figure 2**

*Widespread and extensive post-transcriptional modifications in Ago-bound pre-miRNAs*

- A.** Nucleotide composition of RNA modifications for every tail position in *WT* pre-miRNA library.
- B.** Northern blot for miR-31 from Ago IPs from *wild-type* (*Ago2*<sup>+</sup>) or catalytically inactive (*D669A*<sup>+</sup>) *Ago2*-transduced MEFs. Ac-pre-miR-31: *Ago2*-cleaved pre-miR-31.
- C.** *In vitro* cleavage assay. 5' radiolabeled pre-miR-31 was incubated in lysates prepared from *Ago2*<sup>+</sup> or *D669A*<sup>+</sup> MEFs.
- D.** Nucleotide composition of RNA modifications for every tail position in *WT* miRNA library.
- E.** Nucleotide composition of RNA modifications surrounding the annotated 5' ends of 5p miRNAs in *WT* miRNA library.
- F.** Nucleotide composition of RNA modifications surrounding the defined 3' ends of pre-miRNAs in *D2A* pre-miRNA library.

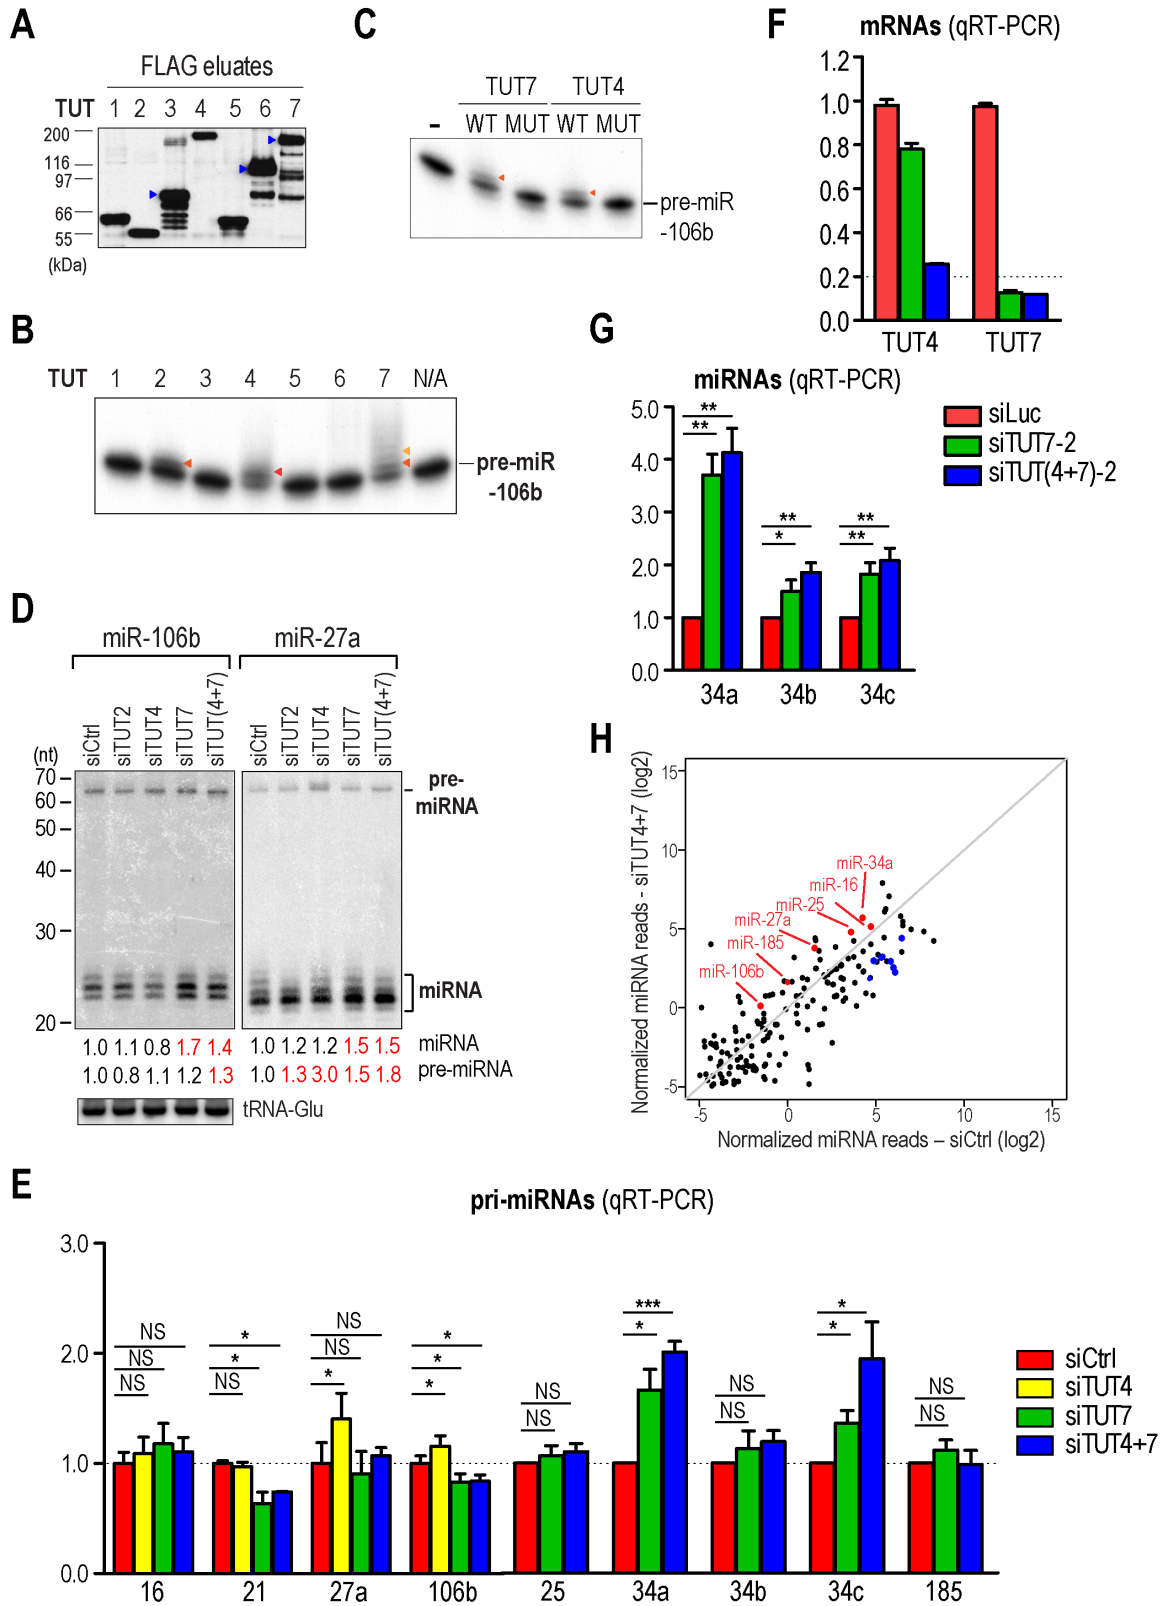

Figure S3.

**Figure S3. Related to Figure 3**

*Uridylation of pre-miRNAs by TUT7 and TUT4 fine tunes select miRNA biogenesis*

- A.** Western blot of eluates from immunopurified FLAG-TUTs: TUT1 (mtPAP/PAPD1), TUT2 (GLD2/PAPD4), TUT3 (PAPD5/TRF4-2), TUT4 (ZCCHC11/PAPD3), TUT5 (POLS/TRF4-1), TUT6 (PAPD2) and TUT7 (ZCCHC6/PAPD6).
- B.** Uridylation assay of 5' radiolabeled pre-miR-106b with indicated FLAG-TUTs.
- C.** Uridylation assay of pre-miR-106b with wild-type (WT) or catalytically inactive (Mut) FLAG-TUT4 and FLAG-TUT7.
- D.** Representative northern blots for miR-106b and miR-27a from indicated knockdown cells. Numbers indicate fold changes of pre-miRNAs and miRNAs relative to the control knockdown. tRNA-Glu: loading control.
- E.** Pri-miRNA levels in indicated knockdown cells, measured by northern blotting. standard error of the mean (SEM) is from at least three independent experiments. Statistical significance was calculated by two-tail t test.
- F, G.** TUT4 and TUT7 (**F**) as well as miRNA (**G**) levels in MEFs depleted with a second set of siRNAs against TUT4 and TUT7, measured by quantitative real-time (qRT)-PCR (**F**) and Taqman miRNA assay (**G**) respectively. SEM (Werner et al. 2008) is from three experiments. siLuc, siRNA against Luciferase. Statistical significance was calculated by one-tail t test.
- H.** The abundance of a subset of miRNAs is significantly altered upon depletion of TUT4 and TUT7. Red dots designate miRNAs that have been experimentally verified in this study. Blue dots denote let-7 family members.

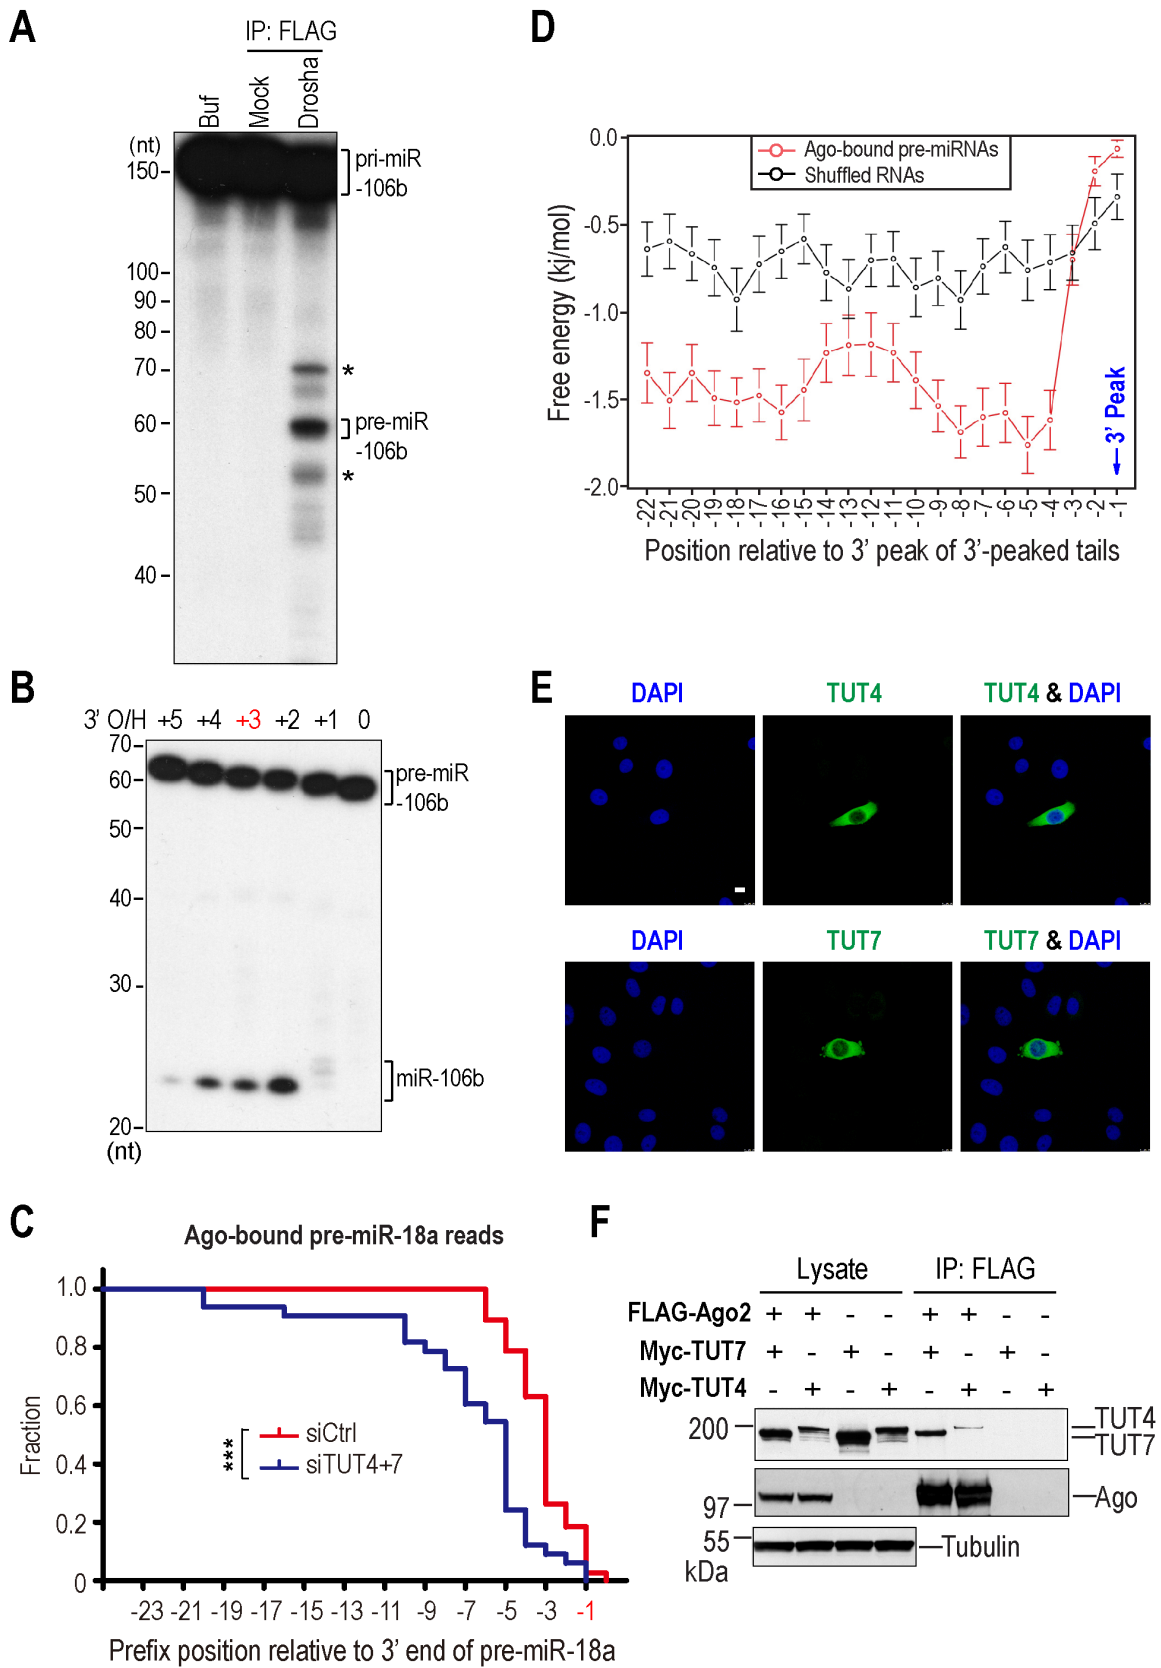

Figure S4.

#### **Figure S4. Related to Figure 4**

##### *Uridylation of Ago-bound pre-miRNAs by TUT7 and TUT4 facilitates their degradation*

- A.** In-vitro Droscha processing of pri-miR-106b. Asterisks depict single strands that flank the stem of the hairpin.
- B.** In-vitro Dicer processing of pre-miR-106b with a native or progressively shortened 3' overhangs.
- C.** Reverse cumulative plot of prefix positions of pre-miR-18a reads relative to its native 3' end (position -1), sequenced from Ago-IPs from indicated knockdown cells. Statistical significance was calculated by Anderson-Darling (A-D) test. NS, non-significant; \*,  $p < 0.05$ ; \*\*,  $p < 0.01$ ; \*\*\*,  $p < 0.001$ . Same depiction applies to all figures.
- D.** Average Gibbs free energy for every position upstream of the 3' peak of tailed Ago-bound pre-miRNAs or of randomly shuffled RNAs. Error bars represent 95% CIs.
- E.** Subcellular localization of TUT4 and TUT7. Representative confocal images of HeLa cells transfected with FLAG-TUT4 or FLAG-TUT7. Blue, DAPI; Green, FLAG-TUT4/7. Scale bar, 10  $\mu\text{m}$ .
- F.** Interaction of TUT4 and TUT7 with Ago2. Western blots of lysates and FLAG IPs from 293T cells co-expressing Myc-TUT4 or Myc-TUT7 with FLAG-Ago2. Tubulin: loading control.

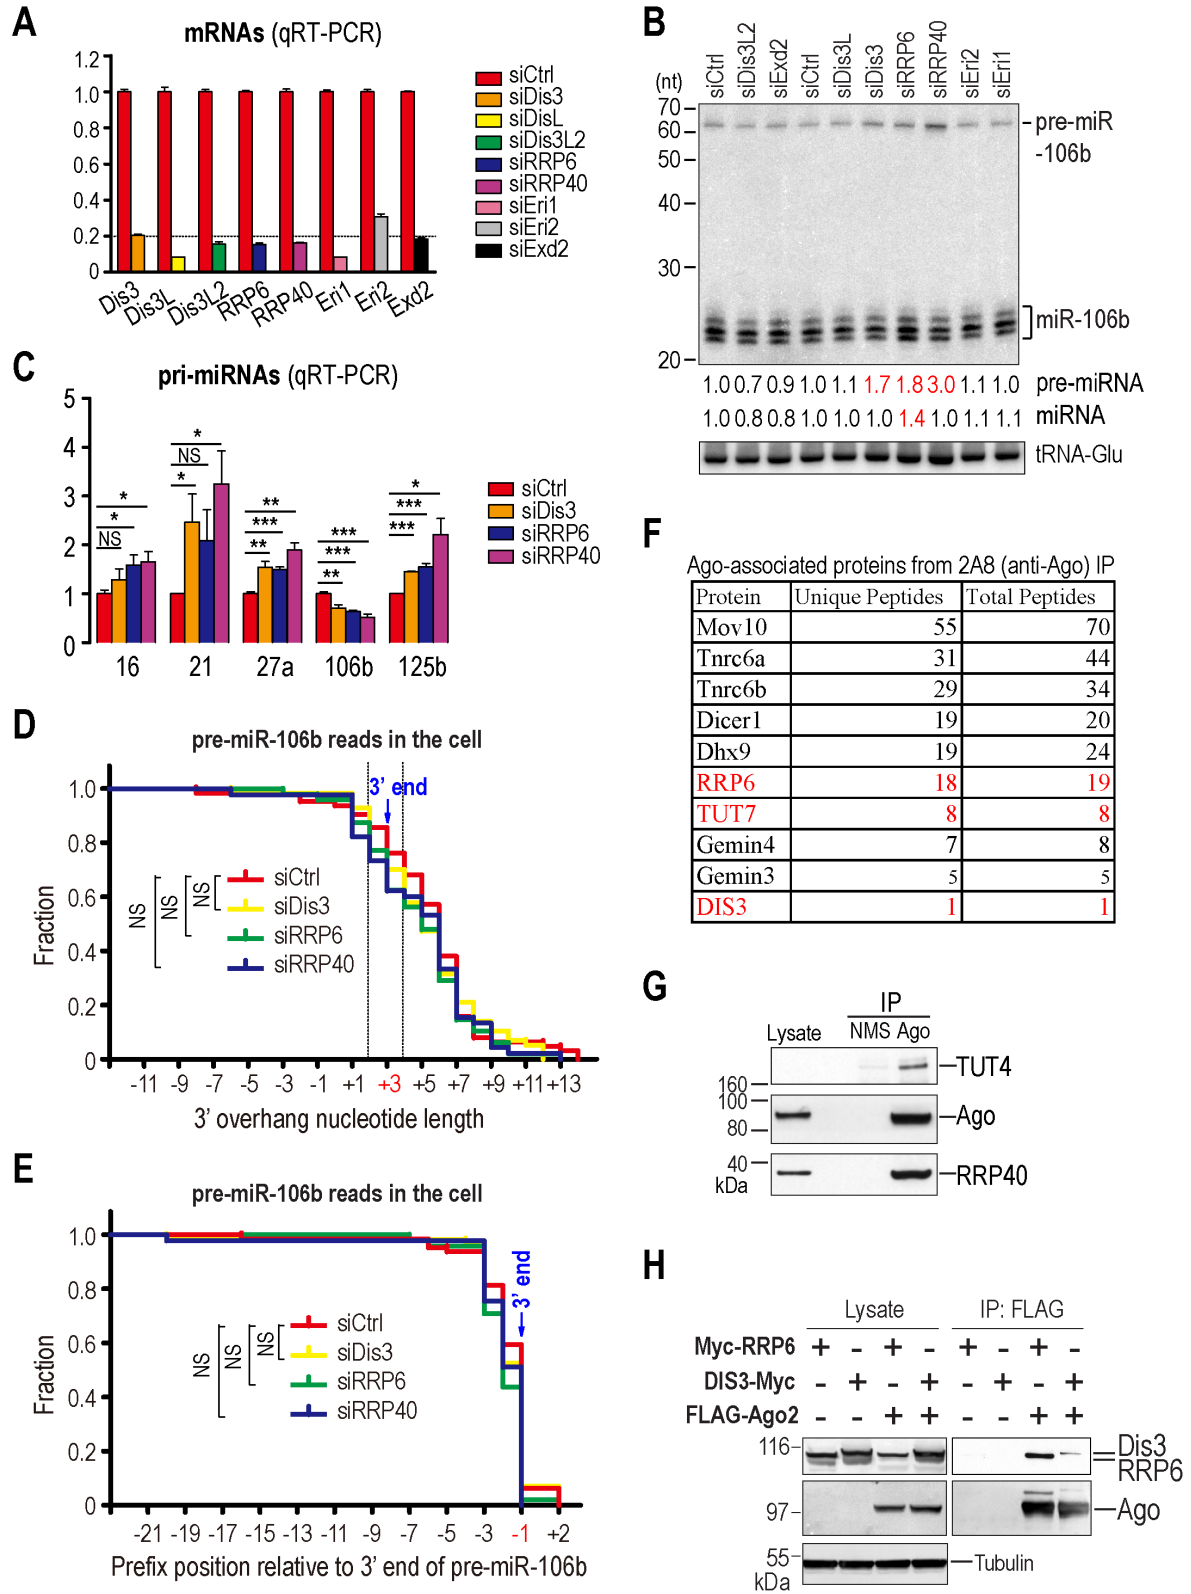

Figure S5.



## Figure S5. Related to Figure 5

### *Quality control and turnover of pre-miRNAs by the exosome*

- A.** mRNA levels of 3' exoribonucleases in indicated knockdown cells, measured by qRT-PCR. SEM is from four experiments.
- B.** A representative northern blot of total RNAs from indicated knockdown cells. Numbers indicate fold changes of pre-miR-106b and miR-106b relative to the control knockdown.
- C.** Pri-miRNA levels from cells in indicated knockdown cells, measured by qRT-PCR. SEM is from four experiments.
- D.** Reverse cumulative plot of 3' overhang lengths of pre-miR-106b reads (fully-mapped and tailed), sequenced from indicated knockdown cells. Reads whose ends fall within the two dotted lines are optimal Dicer substrates. The native 3' overhang length of pre-miR-106b is +3. Positive and negative values indicate 3' and 5' overhangs respectively. Statistical significance was calculated by A-D test.
- E.** Reverse cumulative plot of prefix positions of pre-miR-106b reads relative to its native 3' end (position -1), sequenced from indicated knockdown cells. Statistical significance was calculated by A-D test.
- F, G.** Association of RRP6, DIS3, RRP40, TUT4, TUT7 with endogenous Agos in MEFs. Endogenous Agos were immunoprecipitated with an anti-Ago monoclonal antibody (2A8) in Dicer knock-out MEFs reconstituted with catalytically inactive Dicer (D2A); immunoprecipitates were resolved by NuPAGE and co-precipitating proteins were excised from the gel and identified by mass spectrometry (**F**) or by Western blots (**G**); non-immune mouse serum (NMS) served as negative control. This approach was chosen because in D2A cells the majority of Agos associate with pre-miRNAs in miRLC or miPDC (Liu et al., 2012), which allows isolation of proteins that interact with Ago/pre-miRNA. In contrast, in cells with wild-type Dicer the majority of Agos are engaged with miRNAs in miRNP/RISC while levels of miRLC or miPDC are very low.
- H.** Western blots of lysates and FLAG IPs from 293T cells co-expressing Myc-RRP6 or DIS3-Myc with FLAG-Ago2. Tubulin: loading control.

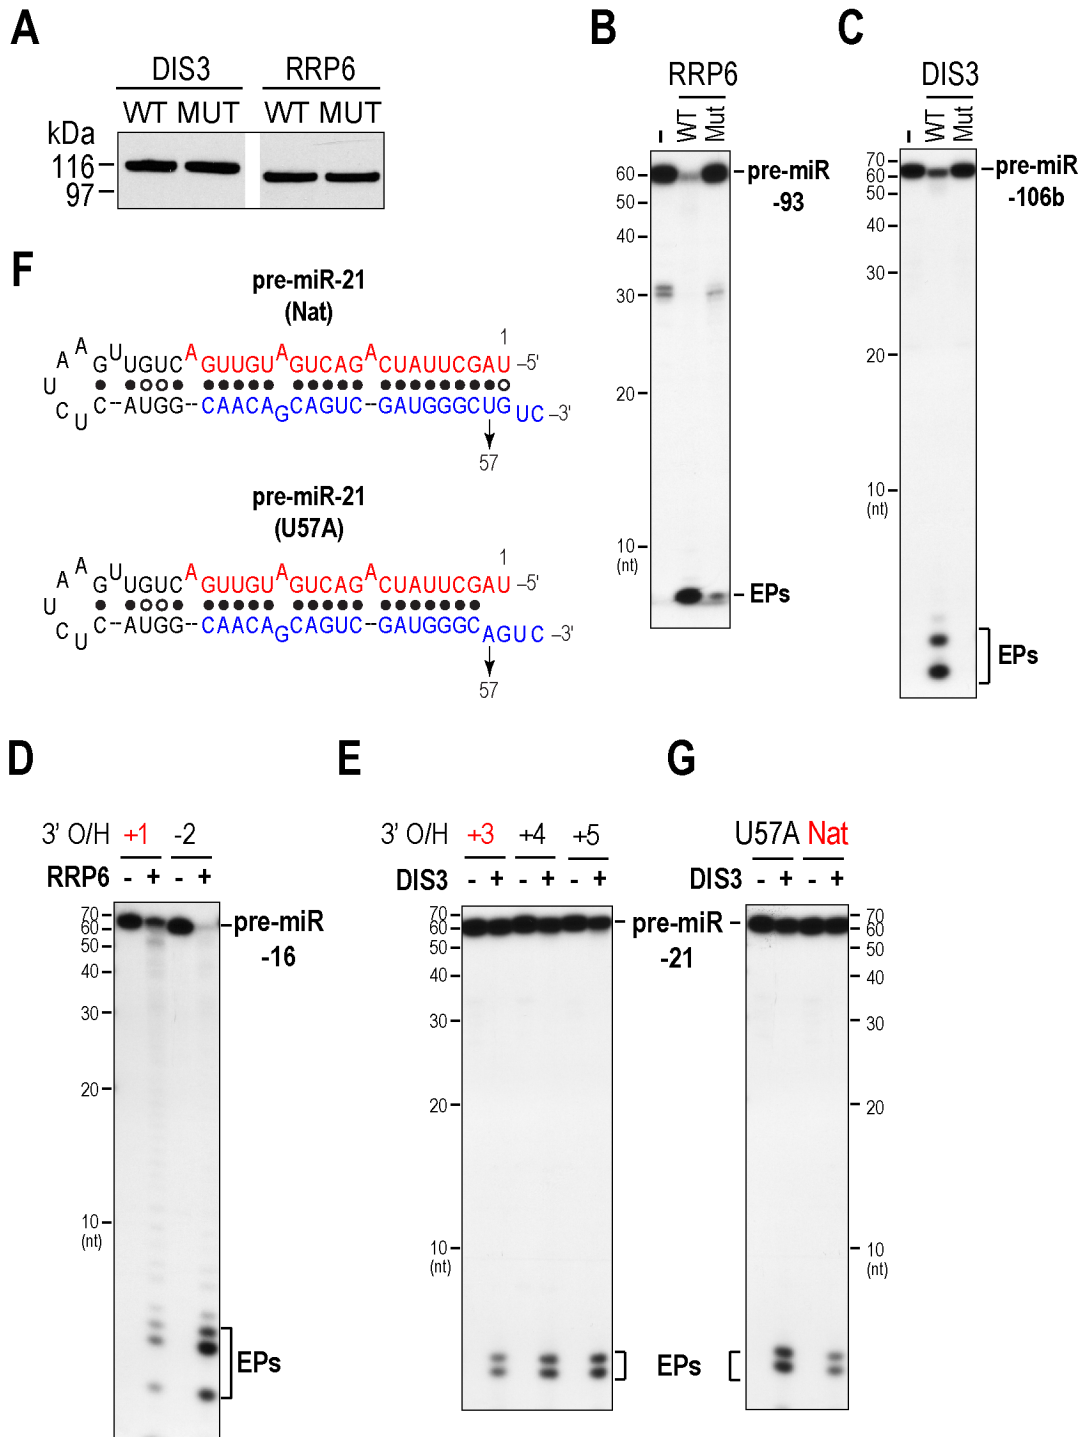

Figure S6.

**Figure S6. Related to Figure 6**

*Distinct preference of DIS3 and RRP6 towards pre-miRNAs*

- A.** Western blots of immunopurified, wild-type (WT) or catalytically inactive (Mut) Dis3-FLAG and FLAG-RRP6.
- B.** Decay assay using immunopurified, wild-type (WT) or catalytically inactive (Mut) FLAG-RRP6 and 5' radiolabeled pre-miR-93. EPs, end products.
- C.** Decay assay using immunopurified, wild-type (WT) or catalytically inactive (Mut) DIS3-FLAG and 5' radiolabeled pre-miR-106b.
- D.** Decay assay using FLAG-RRP6 and pre-miR-16 with either a native 3' overhang or an engineered 2-nt 5' overhang.
- E.** Decay assay using Dis3-FLAG and pre-miR-21 with either a native 3' overhang or uridylated tails.
- F.** Schematic of pre-miR-21 and U57A mutant.
- G.** Decay assay using Dis3-FLAG with native or mutated (U57A) pre-miR-21.

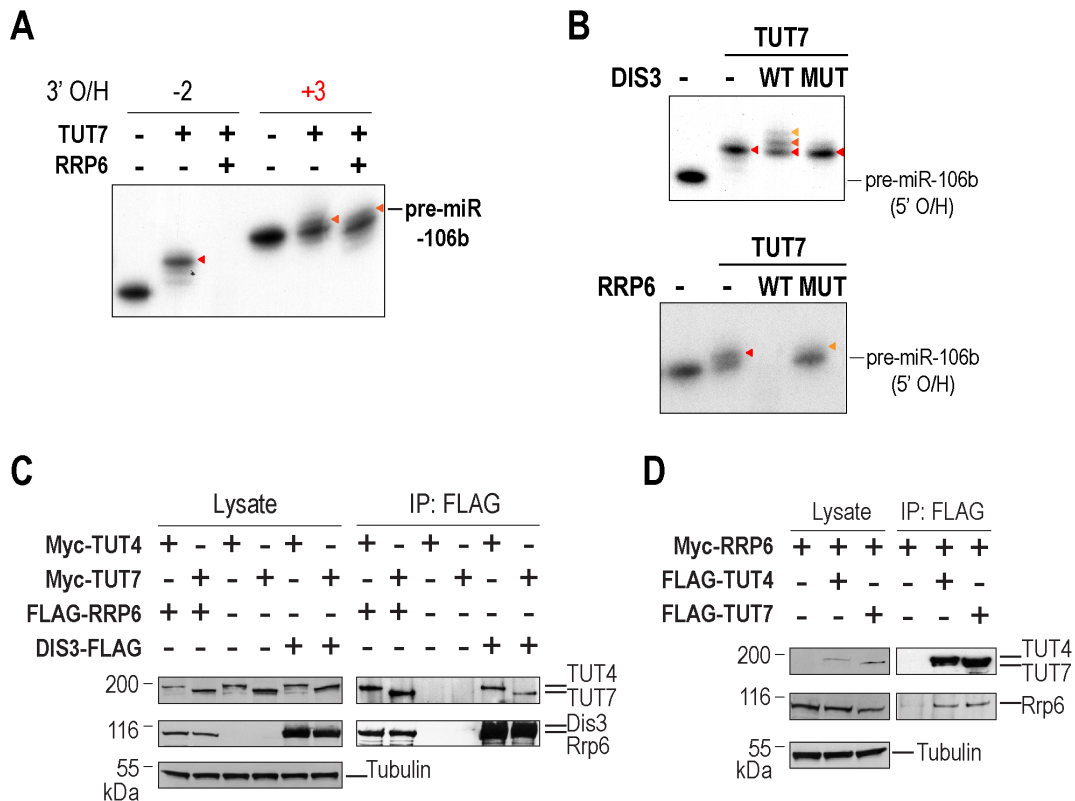

**Figure S7. Related to Figure 7**

*A positive feedback loop constituted by TUT7, TUT4 and the exosome in uridylation and degradation of pre-miRNAs*

**A.** Uridylation assay using FLAG-TUT7 and FLAG-RRP6 with pre-miR-106b harboring different 3' overhangs. The absence of RNAs in lane 3 was due to degradation of pre-miR-106b with 2-nt 5' overhang by FLAG-RRP6 (data not shown).

**B.** Uridylation assay using FLAG-TUT7 and wild-type (WT) or catalytically inactive (MUT) DIS3 (top panel) or RRP6 (bottom panel) with pre-miR-106b harboring a 2-nt 5' overhang. Catalytically inactive DIS3 or RRP6 do not stimulate the activity of TUT7.

**C.** Interaction of TUT4 and TUT7 with DIS3 and RRP6. Western blots of lysates and FLAG immunoprecipitates from 293T cells co-expressing Myc-TUT4 or Myc-TUT7 with DIS3-FLAG or FLAG-RRP6. Tubulin: loading control.

**D.** Interaction of RRP6 with TUT4 and TUT7. Western blots of lysates and FLAG immunoprecipitates from 293T cells co-expressing FLAG-TUT4 or FLAG-TUT7 with Myc-RRP6. Tubulin: loading control.

## **SUPPLEMENTAL TABLE LEGENDS**

### **Table S1**

Profiles of Ago-bound pre-miRNAs from WT or D2A MEFs. Related to Figure 1, 2.

### **Table S2**

Uridylation ratios of 3p miRNAs in knock-down cells, Related to Figure 3.

### **Table S3**

Expression changes of miRNAs in knock-down cells, Related to Figure 3.

### **Table S4**

pre-miR-106b reads from Ago IPs from knock-down MEFs. Related to Figure 4, 5.

### **Table S5**

pre-miR-18a reads from Ago IPs from knock-down MEFs. Related to Figure 4.

### **Table S6**

pre-miR-106b reads from total RNAs of knock-down MEFs. Related to Figure 5.

### **Table S7**

Oligonucleotide sequences used in this study.
